# Supplementary material
Source: PubMed Central journal article supplement (PMC7244221)
Supplement: ao8b03447_si_001.pdf [file ao8b03447_si_001.pdf]

**Supporting Information**

*Insights into substrate and inhibitor selectivity among  
human GLUT transporters through comparative  
modeling and molecular docking*

*Rafaela Salgado Ferreira<sup>a,b</sup>, Jean Luc Pons<sup>a</sup> and Gilles Labesse<sup>a,\*</sup>*

<sup>a</sup>Centre de Biochimie Structurale, CNRS-5048, INSERM-U1054, Université de Montpellier, 29  
Rue de Navacelles, 34090, Montpellier, France

<sup>b</sup>Laboratório de Modelagem Molecular e Planejamento de Fármacos, Departamento de Bioquímica  
e Imunologia, Universidade Federal de Minas Gerais, Av. Antônio Carlos 6627, 31270-901  
Belo Horizonte, Brazil

\*Corresponding author. Centre de Biochimie Structurale, CNRS-5048, INSERM-U1054, Université  
de Montpellier, France. E-mail address: [labesse@cbs.cnrs.fr](mailto:labesse@cbs.cnrs.fr)

**Figure S1. Sequence alignment of GLUT1-14.** Alignment performed with T-COFFEE and adjusted with Vito. N-terminal and C-terminal regions from several sequences are not shown, as indicated by slashes. TM1-12 indicate transmembrane helices, while ICH1-4 indicate helices from the intracellular helical domain. Stars indicate positions that hydrogen bond to glucose in PDB 4ZW9. Figure prepared with ESPrpt 3.0.<sup>1</sup>

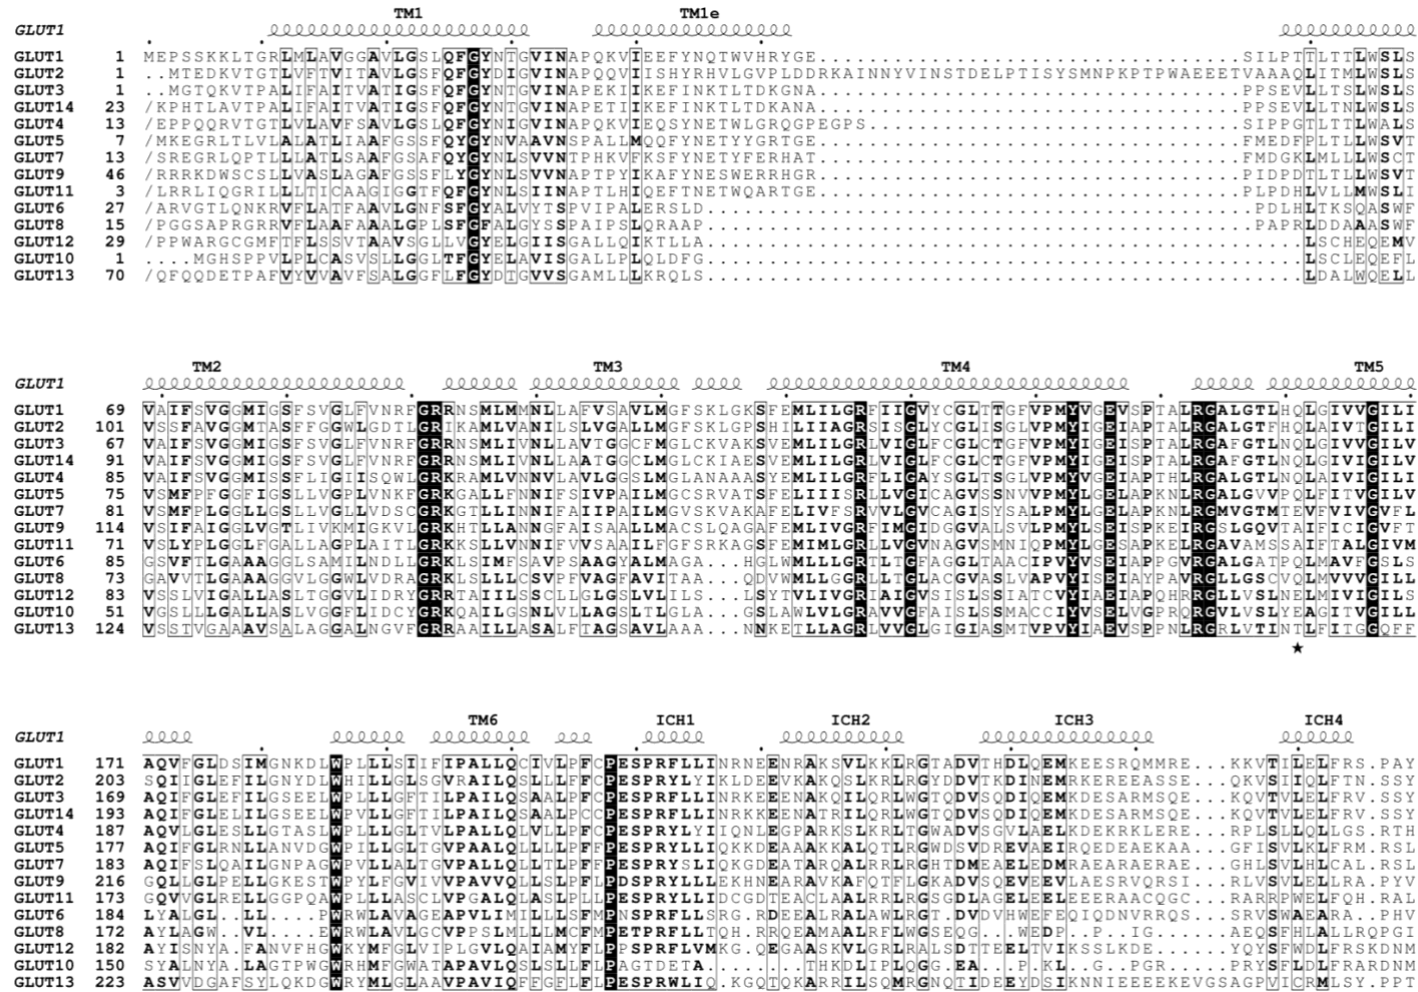

**GLUT1** TM7 TM8 TM9  
 00000000000000 00000000000000 00000000000000000000 00000000000000000000  
**GLUT1** 269 RQPIILIAVVLQLSQQLSGINAVFYSTSIPEKAGVQ...QPVVYATIGSGIVNTAF TVVSLFVVERAGRRTLHLIGLAGMAGCAILMTIALALLE.....  
**GLUT2** 301 RQPIILVALMLHVAQQFSGINGIFVYSTSIPTAGIS...KPVVYATIGVGAVNMF TVAVSVFLVEKAGRRSLFLIGMSGMEVCAIFMSVGLVLLN.....  
**GLUT3** 267 RQPIIISIVLQLSQQLSGINAVFYSTGIFKDAVQV...EPIYATIGAGVNTIF TVVSLFVVERAGRRTLHLMIGLGGMAFCSTLMTVSLLLKD.....  
**GLUT14** 291 RQPIIISIVLQLSQQLSGINAVFYSTGIFKDAVQV...QPIYATISAGVNTIF TLLSLFVVERAGRRTLHLMIGLGGMAFCSTLMTVSLLLKN.....  
**GLUT4** 285 RQPLIIAVVLQLSQQLSGINAVFYSTSIPEKAGVQ...QPAYATIGAGVNTVFTLVSVLVEVERAGRRTLHLGLAGMCCGCAILMTVALLE.....  
**GLUT5** 275 RWQLLSIIVLMGGQQLSGVNAIYYADQIYLSAGVPE.EHVQVYTAGVAVNVMTFCVAVFVVELLGRRLLLLCFSICLIACCVLTAALALQD.....  
**GLUT7** 281 RWQLLSIIVLMAGQQLSGINAIYVADTIYTSAGVEA.AHSQVYTVGSGVVNVMTTITSAV LVERLGRRLLLLAGYIGCSACLVLTIVVLLFQN.....  
**GLUT9** 314 RWQVTVIVTMACYQLGGLNAIWFYVNSIFGKAGIPP.AKIPYVTLSTGGIETLAAVFSGLVIEHLGRRLLLIGGFGLMGLFFGTLTITLTLQD.....  
**GLUT11** 271 RRQVTSLVVLGSAMELQGNDSVYAVASSVFRKAGVPE.AKIQYAIIGTGSCELLTAVVSCVVIERVGRRLVLLIGGYSLMTCWGSIFTVALCLQS.....  
**GLUT6** 273 CRPITVALLMRLLQQLTGITPILVYQSIFDSTAVLL...PPKDDAAIVGAVRLLSVLTAAL TMDLAGRRVLLFVSAAIMFAANLTGLVYIHFGRPLSPNST  
**GLUT8** 254 YKPFIIIGVSLMAFQQLSGVNAVMFYAETIFEAKFK...DSSLASVVVGVIVQLVLTAVAAALIMDRAGRRLLVLSGVVMVFSTSAFAFYFKLTQGGPGNSSH  
**GLUT12** 276 RTRIMIGLTLVFFVQITGQPNILFYASTV LKSVGFQSNEAASLASVGVVVISITIPATLLVDHVGSKTFLCIGSSVMAASLVTMGIVNLMIHMFTHICR  
**GLUT10** 229 RGRITVGLGLVLFQQLTGQPNVLCYASTIFSVGFHGGSSAVLASVGLGAVNFATL TAMGLVDRAGRRALLLAGCALMALSVSIGLVSFAVPMDSGSPSCL  
**GLUT13** 323 RRALIVGCGLOMFQQLSGINITIMYVSAITIQMSGVEDDRLAIWLASVTAFTNFIFITLVGVV LVEKVGRRKLT FGS LAGTVALIILALGELVLSAQVSPRITF

**GLUT1** TM10  
 0000000000000000  
**GLUT1** 360 .....QLPWSYLSIVNIFGFVAFEFVGP  
**GLUT2** 392 .....KFSWMSYVSMIAIFLFSFPEIGP  
**GLUT3** 358 .....NYNGMSFVCI GAILVFVAFEFIGP  
**GLUT14** 382 .....HYNGMSFVCI GAILVFVAFEFIGP  
**GLUT4** 376 .....RVPAMSYSIVAIIFGFVAFEFIGP  
**GLUT5** 368 .....TVSWMPYISIVCVI SYVI GHALGP  
**GLUT7** 374 .....RVPELSYLGII CVFYAIGHSIGP  
**GLUT9** 407 .....HAPVWPYLSIVGILAI IASFCSGP  
**GLUT11** 364 .....SFPWTLYLAMACIFAFILSEFIGP  
**GLUT6** 373 A.....GLES.....ESWGDLAQ...PLAAPAGYLLTLP LLAATM LFMGYAVGVW  
**GLUT8** 353 .....VA.....ISA.PVSA...QPVDASVGLAWLAVGSMCLFIA GFVGVW  
**GLUT12** 378 SHNSINQSLDESVIYGPGLNSTNNNLRDHFKGISSSHRSLLMPLRNDVDRKGETTSASLLNAGLSHTEYQIVTDPGDVP AFLRWLSLASLLLVYVAFSIGL  
**GLUT10** 331 AVPNATGQTGLPGDSSLQDSSLPPP IPTNEDQREPILSTAKTKPHRSPGDPSPAPPR LALSSALPGPP...LPARGHALLRW TALLCLMVVSAF SFGF  
**GLUT13** 425 KPIAPSGQNATCTRYSYCNECMLDPDCGFCYKMNKSTVIDSSCVPVNKASTNEAAWRCENETKFKTED..IFWAYNFCPTPYSWTALLGLILYLVFAEPGM

**GLUT1** TM11 TM12  
 00000000 00000000000000000000000000 00000000000000000000000000  
**GLUT1** 384 GPIPWFI VAEELF SQGPRPAAIAVAGFSNWT SNFIVGMCQYVEQLCG.PYVFIIFTVLLVLF FIFTYFKVPEPKGRTFDEI ASQFRQGGASQSDKTP/  
**GLUT2** 416 GPIPWFMVAEELF SQGPRPAAIAIAAFSNWT CNFIVALCQYIADFCG.PYVFI LFAVGLLAF TLF TFFKVPETKGSFEETIAAEFKKSGSAHRPKA/  
**GLUT3** 382 GPIPWFI VAEELF SQGPRPAAIAVAGCSNWT SNFLVGLLEP SAAYYLG.AYVFI IFTGFLITFLAF TFFKVPETRGRTFEDI TRAFEGQAHGADRSGK/  
**GLUT14** 406 GPIPWFI VAEELF SQGPRPAAIAVAGCSNWT SNFLVGLLEP SAAYYLG.AYVFI IFTGFLITFLAF TFFKVPETRGRTFEDI TRAFEGQAHGADRSGK/  
**GLUT4** 400 GPIPWFI VAEELF SQGPRPAAIAVAGFSNWT SNFIIGMGEQYVAEAMG.PYVFI LFAVLLLGFF IFTFLRVPETRGRTFDI ISAAFHRTPS...LLE/  
**GLUT5** 392 SPIPALLITEIFLQSSRRPAEFMVGGSVHWLTSNFIVGLIEPFFIQEGLG.PYSFIVFAVICLLT TIYIFLIVPETKAKTFEINQIFTKMN..KVSEVY/  
**GLUT7** 398 SPVPSVVRTEIFLQSSRRPAEFMV DGAVHWLTSNFIIIGFEPF SIQEAIG.AYSFIIIFAGICLLT AIYIYVVIPEPKGTFVEINRIFAKRN..RVKLPE/  
**GLUT9** 431 GGIPFILTGEFFQOSORPAAEIIAGTVNWLTSNFVAGLIEPFFIQKSLD.TYCYLVFVATICITGAIYLYFVLPETKNRTYAEISQAFSKRNK...../  
**GLUT11** 388 AGVTGILATELFDQMARPAACMVCGALMWMLIILVGLGEPFIMEALS.HFLYVFFLGVCCVCGAIYTGFLPEPKGTFQEISKELHRLNFPRAQGP/  
**GLUT6** 414 GPI TWLLMSEVFLP LARGVASGLCVLASWLTAFVLT KSELPVVS TFGLVQVPEFFFAAICLVSLVFTGCCVPETKGRSLEQIESFRTGRRSFLR....  
**GLUT8** 390 GPIPWLLMSEIFPLHVKGVAITGICVLTNWLMAFLVTKSEFSLMEVLRPYGAFWLASAFCFPSVLF TFCVPEPKGTFLEQITAHFEGR.....LLE/  
**GLUT12** 480 GMPWLVLSIEIFPGGIRGRAMALTSSMNWGINLLSLEPLTVDLIGLWVVCFLIYTIMSLASLLFVVMFPETKGSLEQISMEIAKVNYVKNNICF/  
**GLUT10** 428 GPVTWLVLSIEIYVEIRGRAFAFCNSFNWAAANLFIISLSEPLD LIGTIGLSWTFIYGLTAVLGLGF IYLFVPEPKGSLAEIDQQFKRRFTLSFGHR/  
**GLUT13** 525 GMPWTVNSIEIYPLWARSTGNACSSGINWIFNVVLSLTP LHTAEYLYYGAFLYAGFAAVGLLFIYGCLEPKGKLEELIESLFDNRLCTCGTSDS/

**Table S1. Sequence identity matrix for GLUT1-14, obtained after sequence alignment with Clustal Omega.**

|        | GLUT1 | GLUT2 | GLUT14 | GLUT3 | GLUT4 | GLUT11 | GLUT9 | GLUT7 | GLUT5 | GLUT6 | GLUT8 | GLUT13 | GLUT10 | GLUT12 |
|--------|-------|-------|--------|-------|-------|--------|-------|-------|-------|-------|-------|--------|--------|--------|
| GLUT1  | 100.0 | 55.8  | 61.6   | 63.5  | 65.5  | 35.1   | 36.9  | 38.0  | 41.1  | 28.6  | 29.7  | 26.0   | 26.0   | 26.1   |
| GLUT2  | 55.8  | 100.0 | 50.2   | 52.0  | 54.3  | 31.6   | 30.3  | 35.7  | 40.2  | 28.3  | 29.2  | 31.1   | 27.1   | 28.6   |
| GLUT14 | 61.6  | 50.2  | 100.0  | 94.6  | 55.6  | 32.4   | 33.9  | 36.6  | 37.4  | 26.4  | 31.4  | 28.4   | 24.9   | 26.4   |
| GLUT3  | 63.5  | 52.0  | 94.6   | 100.0 | 57.6  | 33.4   | 34.7  | 38.0  | 39.1  | 27.0  | 32.7  | 29.4   | 24.6   | 26.8   |
| GLUT4  | 65.5  | 54.3  | 55.6   | 57.6  | 100.0 | 35.6   | 35.8  | 38.9  | 42.4  | 28.5  | 31.6  | 28.2   | 27.5   | 27.3   |
| GLUT11 | 35.1  | 31.6  | 32.4   | 33.4  | 35.6  | 100.0  | 40.2  | 40.5  | 40.5  | 23.3  | 25.9  | 21.6   | 23.4   | 21.1   |
| GLUT9  | 36.9  | 30.3  | 33.9   | 34.7  | 35.8  | 40.2   | 100.0 | 42.6  | 43.7  | 24.4  | 26.4  | 23.1   | 21.3   | 20.2   |
| GLUT7  | 38.0  | 35.7  | 36.6   | 38.0  | 38.9  | 40.5   | 42.6  | 100.0 | 59.3  | 25.1  | 27.1  | 25.6   | 27.1   | 25.3   |
| GLUT5  | 41.1  | 40.2  | 37.4   | 39.1  | 42.4  | 40.5   | 43.7  | 59.3  | 100.0 | 27.0  | 29.1  | 26.8   | 26.3   | 23.9   |
| GLUT6  | 28.6  | 28.3  | 26.4   | 27.0  | 28.5  | 23.3   | 24.4  | 25.1  | 27.0  | 100.0 | 42.8  | 27.5   | 29.9   | 25.4   |
| GLUT8  | 29.7  | 29.2  | 31.4   | 32.7  | 31.6  | 25.9   | 26.4  | 27.1  | 29.1  | 42.8  | 100.0 | 31.2   | 30.0   | 29.2   |
| GLUT13 | 26.0  | 31.1  | 28.4   | 29.4  | 28.2  | 21.6   | 23.1  | 25.6  | 26.8  | 27.5  | 31.2  | 100.0  | 31.0   | 29.0   |
| GLUT10 | 26.0  | 27.1  | 24.9   | 24.6  | 27.5  | 23.4   | 21.3  | 27.1  | 26.3  | 29.9  | 30.0  | 31.0   | 100.0  | 40.1   |
| GLUT12 | 26.1  | 28.6  | 26.4   | 26.8  | 27.3  | 21.1   | 20.2  | 25.3  | 23.9  | 25.4  | 29.2  | 29.0   | 40.1   | 100.0  |

Table S2. Reported substrates for GLUT1-14.

| Receptor | REPORTED SUBSTRATES*2 |                  |                  |         |             |                     |        |                     |                  |                      |                                    |                     |
|----------|-----------------------|------------------|------------------|---------|-------------|---------------------|--------|---------------------|------------------|----------------------|------------------------------------|---------------------|
|          | glucose               | galactose        | 2-desoxyglucose  | mannose | glucosamine | fructose            | xylose | urate               | trehalose        | dehydroascorbic acid | alpha-MG<br>(alpha-methyl-glucose) | myo-inositol        |
| GLUT1    | 3 mM <sup>3</sup>     | YES              |                  | YES     | YES         |                     |        |                     |                  | YES                  |                                    |                     |
| GLUT2    | 17 mM <sup>3</sup>    | YES              |                  | YES     | YES         | YES                 |        |                     |                  |                      |                                    |                     |
| GLUT3    | 1.4 mM <sup>3</sup>   | YES              |                  | YES     |             |                     | YES    |                     |                  | YES <sup>4</sup>     |                                    |                     |
| GLUT4    | 5 mM <sup>3</sup>     |                  |                  |         | YES         |                     |        |                     |                  | YES <sup>3</sup>     |                                    |                     |
| GLUT14   | YES                   | YES              |                  | YES     |             |                     | YES    |                     |                  | YES                  |                                    |                     |
| GLUT5    | NO                    |                  |                  |         |             | YES <sup>5</sup>    |        |                     |                  | NO <sup>4</sup>      |                                    |                     |
| GLUT7    | YES                   | NO               |                  |         |             | YES <sup>5</sup>    | NO     |                     |                  | NO <sup>4</sup>      |                                    |                     |
| GLUT9    | 0.6 mM <sup>3</sup>   |                  |                  |         |             | 0.4 mM <sup>3</sup> |        | 0.9 mM <sup>3</sup> |                  | NO <sup>4</sup>      |                                    |                     |
| GLUT11   | YES                   | NO               |                  |         |             | YES                 |        |                     |                  | NO <sup>4</sup>      |                                    |                     |
| GLUT6    | YES                   |                  |                  |         |             |                     |        |                     |                  | NO <sup>4</sup>      |                                    |                     |
| GLUT8    | 2 mM <sup>3</sup>     | YES              |                  |         |             | YES                 |        |                     | YES <sup>6</sup> | YES <sup>4</sup>     |                                    |                     |
| GLUT10   | YES                   | YES              |                  |         |             |                     |        |                     |                  | NO <sup>4</sup>      |                                    |                     |
| GLUT12   | YES <sup>7</sup>      | YES <sup>7</sup> | YES <sup>7</sup> |         |             | YES <sup>7</sup>    |        |                     |                  | YES <sup>8</sup>     | YES <sup>7</sup>                   |                     |
| GLUT13   | NO                    |                  |                  |         |             |                     |        |                     |                  |                      |                                    | 100 μM <sup>3</sup> |

\*Unless another reference is specified, data was extracted from Yan, 2017.<sup>2</sup> For cases where a  $K_d$  value was reported, the affinity is indicated. Otherwise, YES indicated the substrated is transported. NO indicates it is not transported, and blank cells indicates that no data was found.

**Table S3. Conservation of exofacial GLUT10 binding site in 250 homologous sequences.**

| Statistics after Clustal Omega alignment | Residue |      |      |      |      |      |      |
|------------------------------------------|---------|------|------|------|------|------|------|
|                                          | E140    | Q242 | Q243 | P248 | K280 | S424 | W432 |
| <b>% conservation</b>                    | 100     | 100  | 100  | 100  | 100  | 100  | 97.2 |
| <b>Occupancy*</b>                        | 250     | 250  | 250  | 250  | 250  | 250  | 247  |

\*number of aligned sequences among a total of 250 sequences considered.

**Table S4. Conservation of exofacial GLUT12 binding site in 250 homologous sequences.**

| Statistics after Clustal Omega alignment | Residue |      |      |      |      |      |      |
|------------------------------------------|---------|------|------|------|------|------|------|
|                                          | E172    | V289 | Q290 | P295 | K327 | S476 | W484 |
| <b>% conservation</b>                    | 99.6    | 100  | 99.6 | 100  | 100  | 100  | 88   |
| <b>Occupancy*</b>                        | 249     | 250  | 250  | 250  | 250  | 250  | 236  |

\*number of aligned sequences among a total of 250 sequences considered.

**Table S5. Myo-inositol binding site residues and their conservation within GLUTs.**

|                            |                       | Selected residues in the binding site |             |             |             |             |             |             |             |             |
|----------------------------|-----------------------|---------------------------------------|-------------|-------------|-------------|-------------|-------------|-------------|-------------|-------------|
| <b>Reference protein</b>   | <b>GLUT13</b>         | <b>T213</b>                           | <b>Q220</b> | <b>Q336</b> | <b>Q337</b> | <b>N342</b> | <b>N374</b> | <b>A521</b> | <b>W529</b> | <b>N552</b> |
|                            | <b>GLUT1</b>          | Q161                                  | I168        | Q282        | Q283        | N288        | N317        | E380        | W388        | N411        |
|                            | <b>GLUT2</b>          | Q193                                  | I200        | Q314        | Q315        | N320        | N349        | E412        | W420        | N443        |
|                            | <b>GLUT3</b>          | Q159                                  | I166        | Q280        | Q281        | N286        | N315        | E378        | W386        | N409        |
|                            | <b>GLUT4</b>          | Q177                                  | I184        | Q298        | Q299        | N304        | N333        | E396        | W404        | N427        |
|                            | <b>GLUT5</b>          | Q167                                  | I174        | Q288        | Q289        | N294        | N325        | A380        | A396        | H419        |
|                            | <b>GLUT6</b>          | Q174                                  | S181        | Q286        | Q287        | T292        | R322        | A410        | W418        | S441        |
| <b>Other GLUTs</b>         | <b>GLUT7</b>          | E173                                  | V180        | Q294        | Q295        | N300        | N331        | S394        | S402        | H425        |
|                            | <b>GLUT8</b>          | Q162                                  | I169        | Q267        | Q268        | N273        | Q302        | A386        | W394        | N417        |
|                            | <b>GLUT9</b>          | A206                                  | V213        | Y327        | Q328        | N333        | E364        | C427        | F435        | N458        |
|                            | <b>GLUT10</b>         | E140                                  | I147        | Q242        | Q243        | P248        | K280        | S424        | W432        | N455        |
|                            | <b>GLUT11</b>         | A163                                  | I170        | M284        | E285        | D290        | E321        | G384        | G392        | M415        |
|                            | <b>GLUT12</b>         | E172                                  | I179        | V289        | Q290        | P295        | K327        | S476        | W484        | N507        |
|                            | <b>GLUT14</b>         | Q183                                  | I190        | Q304        | Q305        | N310        | N339        | E402        | W410        | N433        |
| <b>Top 250 Blastp hits</b> | <b>% conservation</b> | 96.4                                  | 99.6        | 100         | 100         | 99.6        | 99.6        | 96.8        | 96.8        | 96.4        |
|                            | <b>occupancy</b>      | 249                                   | 249         | 250         | 250         | 250         | 250         | 243         | 243         | 242         |

\*GLUT13 residues which are predicted to hydrogen bond to myo-inositol are shown in bold. For all other receptors. Cells are colored red if the residue differs from the one found in GLUT13 and green otherwise.



**Table S6. Urate binding site residues and their conservation within GLUTs.**

|                   |                           | Selected residues in predicted urate binding site |      |      |      |      |      |      |      |
|-------------------|---------------------------|---------------------------------------------------|------|------|------|------|------|------|------|
| Reference protein | GLUT9                     | Y71                                               | Y327 | Q328 | N333 | W336 | C427 | F435 |      |
| Other GLUTs       | GLUT1                     | F26                                               | Q282 | Q283 | N288 | F291 | E380 | W388 |      |
|                   | GLUT2                     | F24                                               | Q314 | Q315 | N320 | F323 | E412 | W420 |      |
|                   | GLUT3                     | F24                                               | Q280 | Q281 | N286 | F289 | E378 | W386 |      |
|                   | GLUT4                     | F38                                               | Q298 | Q299 | N304 | F307 | E396 | W404 |      |
|                   | GLUT5                     | Y32                                               | Q288 | Q289 | N294 | Y297 | A380 | A396 |      |
|                   | GLUT6                     | F52                                               | Q286 | Q287 | T292 | L295 | A410 | W418 |      |
|                   | GLUT7                     | Y38                                               | Q294 | Q295 | N300 | N303 | S394 | S402 |      |
|                   | GLUT8                     | F40                                               | Q267 | Q268 | N273 | M276 | A386 | W394 |      |
|                   | GLUT10                    | F22                                               | Q242 | Q243 | P248 | L251 | S424 | W432 |      |
|                   | GLUT11                    | F28                                               | M284 | E285 | D290 | Y293 | G384 | G392 |      |
|                   | GLUT12                    | V54                                               | V289 | Q290 | P295 | L298 | S476 | W484 |      |
|                   | GLUT13                    | F95                                               | Q336 | Q337 | N342 | M354 | A521 | W529 |      |
|                   | GLUT14                    | F48                                               | Q304 | Q305 | N310 | F313 | E402 | W410 |      |
|                   | top 250 GLUT9 Blastp hits | % conservation                                    | 95.6 | 100  | 100  | 100  | 99.6 | 99.6 | 99.7 |
|                   | occupancy                 | 243                                               | 250  | 250  | 250  | 249  | 250  | 249  |      |

\*GLUT9 residues which are predicted to hydrogen bond to urate are shown in bold. For all other receptors. Cells are colored red if the residue differs from the one found in GLUT9 and green otherwise.

**Table S7. Conservation of exofacial GLUT11 binding site in 250 homologous sequences.**

| Statistics after Clustal Omega alignment | Residue |      |      |      |      |      |      |      |
|------------------------------------------|---------|------|------|------|------|------|------|------|
|                                          | A163    | M284 | E285 | N289 | D290 | E321 | G384 | G392 |
| <b>% conservation</b>                    | 90.8    | 88.0 | 92.0 | 92.5 | 96.0 | 92.0 | 98.8 | 97.2 |
| <b>Occupancy*</b>                        | 250     | 246  | 246  | 246  | 246  | 231  | 248  | 247  |

\*number of aligned sequences among a total of 250 sequences considered.

**Table S8. Reported complexes analyzed by comparative docking or docking with PLANTS.**

| <b>Protein</b> | <b>Ligand</b>                   | <b>Study type/ Study name</b>                   | <b>Template/<br/>Anchor</b> |
|----------------|---------------------------------|-------------------------------------------------|-----------------------------|
| GLUT5          | Cytochalasin B                  | Comparative docking/ Raw transfer               | 5EQI/ 5RH                   |
| GLUT7          | Cytochalasin B                  | Comparative docking/ Raw transfer               | 5EQI/ 5RH                   |
| GLUT9          | Cytochalasin B                  | Comparative docking/ Raw transfer               | 5EQI/ 5RH                   |
| GLUT11         | $\alpha$ -D-Glucose             | Docking with PLANTS/ GLUT11ligsAnchor3          | 4ZW9/GLC_A_5<br>(best LPE)  |
| GLUT11         | D-Glucosamine                   | Docking with PLANTS/ GLUT11ligsAnchor3          | 4ZW9/GLC_A_5<br>(best pKd)  |
| GLUT11         | N-Acetyl-glucosamine thiazoline | Docking with PLANTS/ GLUT11ligsAnchor3          | 4ZWC/MAL_A_5<br>(best pKd)  |
| GLUT9          | Urate                           | Docking with PLANTS/ GTR9uratePLANTS0constraint | 4GC0/6BG_A                  |
| GLUT3          | Myo-inositol                    | Docking with PLANTS/ GTR3allPLANTS              | 4ZW9/GLC_A_5<br>(best LPE)  |
| GLUT13         | Myo-inositol                    | Docking with PLANTS/ GTR13allPLANTSupload       | 4ZW9/GLC_A_5<br>(best LPE)  |

## REFERENCES

- (1) Robert, X.; Gouet, P. Deciphering Key Features in Protein Structures with the New ENDscript Server. *Nucleic Acids Res.* **2014**, *42* (W1), W320–W324.
- (2) Yan, N. A Glimpse of Membrane Transport through Structures—Advances in the Structural Biology of the GLUT Glucose Transporters. *J. Mol. Biol.* **2017**, *429* (17), 2710–2725.
- (3) Augustin, R. The Protein Family of Glucose Transport Facilitators: It's Not Only about Glucose after All. *IUBMB Life* **2010**, *62* (5), 315–333.
- (4) Corpe, C. P.; Eck, P.; Wang, J.; Al-Hasani, H.; Levine, M. Intestinal Dehydroascorbic Acid (DHA) Transport Mediated by the Facilitative Sugar Transporters, GLUT2 and GLUT8. *J. Biol. Chem.* **2013**, *288* (13), 9092–9101.
- (5) Ebert, K.; Ewers, M.; Bisha, I.; Sander, S.; Rasputniac, T.; Daniel, H.; Antes, I.; Witt, H. Identification of Essential Amino Acids for Glucose Transporter 5 (GLUT5)-Mediated Fructose Transport. *J. Biol. Chem.* **2018**, *293* (6), 2115–2124.
- (6) Mayer, A. L.; Higgins, C. B.; Heitmeyer, M. R.; Kraft, T. E.; Qian, X.; Crowley, J. R.; Hyrc, K. L.; Beatty, W. L.; Yarasheski, K. E.; Hruz, P. W.; et al. SLC2A8 (GLUT8) Is a Mammalian Trehalose Transporter Required for Trehalose-Induced Autophagy. *Sci. Rep.* **2016**, *6* (1), 38586.
- (7) Pujol-Giménez, J.; Pérez, A.; Reyes, A. M.; Loo, D. D. F.; Lostao, M. P. Functional Characterization of the Human Facilitative Glucose Transporter 12 (GLUT12) by Electrophysiological Methods. *Am. J. Physiol. - Cell Physiol.* **2015**, *308* (12), C1008–C1022.
- (8) Németh, C. E.; Marcolongo, P.; Gamberucci, A.; Fulceri, R.; Benedetti, A.; Zoppi, N.; Ritelli, M.; Chiarelli, N.; Colombi, M.; Willaert, A.; et al. Glucose Transporter Type 10—Lacking in Arterial Tortuosity Syndrome—Facilitates Dehydroascorbic Acid Transport. *FEBS Lett.* **2016**, *590*, 1630–1640.
